# Supplementary material for: Thermally-driven reactivity of Li0.35La0.55TiO3solid electrolyte with LiCoO2cathode
Source: Royal Society of Chemistry journal article supplement (doi:10.1039/d1ta08853j), 2022-01-01
Supplement: d1ta08853j1.pdf [file d1ta08853j1.pdf]

## Supporting Information for “**Thermally-driven reactivity of $\text{Li}_{0.35}\text{La}_{0.55}\text{TiO}_3$ Solid Electrolyte with $\text{LiCoO}_2$ Cathode**”

Subhash Chandra<sup>1 ‡</sup>, Younggyu Kim<sup>1 ‡</sup>, Daniele Vivona<sup>2</sup>, Iradwikanari Waluyo<sup>3</sup>, Adrian Hunt<sup>3</sup>, Christoph Schlueter<sup>4</sup>, Jeong Beom Lee<sup>5</sup>, Yang Shao-Horn<sup>1,2,6</sup> and Bilge Yildiz<sup>1, 7\*</sup>

<sup>1</sup>Department of Materials Science and Engineering, Massachusetts Institute of Technology, Cambridge, Massachusetts 02139, United States

<sup>2</sup>Department of Mechanical Engineering, Massachusetts Institute of Technology, Cambridge, Massachusetts 02139, United States

<sup>3</sup>National Synchrotron Light Source II, Brookhaven National Laboratory, Upton, New York 11973, United States

<sup>4</sup>Photon Science, Deutsches Elektronen-Synchrotron DESY, Notkestr. 85, 22607 Hamburg, Germany

<sup>5</sup>LG Energy Solution, Ltd., LG Science Park, Magokjungang 10-ro, Gangseo-gu, Seoul 07796, Korea.

<sup>6</sup>Research Laboratory of Electronics, Massachusetts Institute of Technology, Cambridge, Massachusetts 02139, United States

<sup>7</sup>Department of Nuclear Science and Engineering, Massachusetts Institute of Technology, Cambridge, Massachusetts 02139, United States

‡Subhash Chandra and Younggyu Kim are equally contributing authors.

\* Correspondence: [byildiz@mit.edu](mailto:byildiz@mit.edu) (B.Y.)

### **Synthesis of $\text{Li}_{0.35}\text{La}_{0.55}\text{TiO}_3$ (LLTO) electrolyte**

$\text{Li}_{0.35}\text{La}_{0.55}\text{TiO}_3$  was synthesized by solid-state reaction following similar procedure described elsewhere <sup>1</sup> with some modifications. The stoichiometric amount of precursor powders  $\text{Li}_2\text{CO}_3$  (99 %, Alfa Aesar),  $\text{La}_2\text{O}_3$  (99.99 %, Sigma Aldrich) and  $\text{TiO}_2$  (anatase, 99.8 %, Sigma Aldrich) were mixed in agate mortar pestle for 30 minutes. This followed calcination of the mixed powders at 1000 °C for 12 hours in ambient air with ramp-up and ramp-down rate of 5 °C/min. The calcined powder was homogenised for 30 minutes with the help of agate mortar pestle. The required amount of calcined powder for pelletising was weighed and mixed with 5 weight % of polyvinyl butyral as a binder additive. Ethanol was added to the

mixture in order to help better mixing of calcined powder and binder additive. The mixture was mixed well in mortar pestle till ethanol evaporates and leaves behind fine powder. The obtained precursor-binder mixture (about 0.5 grams for each pellet) was pressed in die of 10 mm diameter at 5 metric tons. The obtained pellet was covered with calcined precursor powder (not with binder additive) and sintered at 1150 °C for 12 hours in ambient air. The ramp-up and ramp-down rate was kept at 5 °C/min for sintering as well.

### X-ray diffraction of synthesized $\text{Li}_{0.35}\text{La}_{0.55}\text{TiO}_3$ (LLTO)

Figure S1 shows the XRD pattern obtained from as synthesized LLTO electrolyte using Cu  $K\alpha$  radiation source. The XRD peaks (marked red) can be assigned to the tetragonal perovskite LLTO (ICDD: 01-070-6719)<sup>2</sup>. The peak marked with blue corresponds to the Cu  $K\beta$  reflection from the strongest line at 32.65 °.

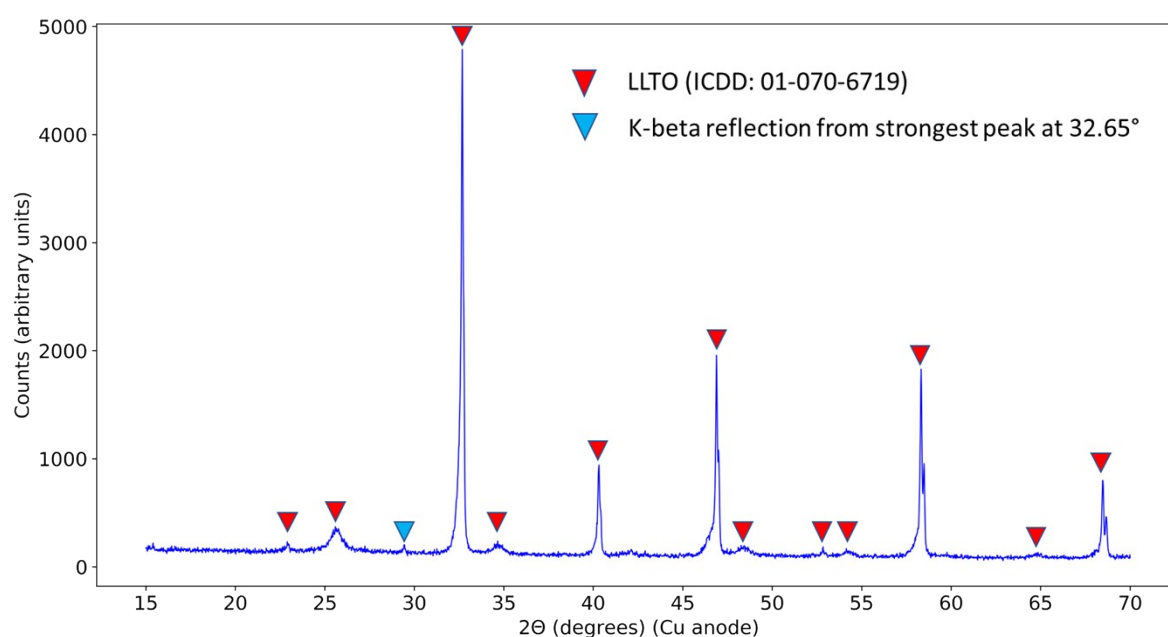

Figure S1: X-ray diffraction pattern obtained from synthesized  $\text{Li}_{0.35}\text{La}_{0.55}\text{TiO}_3$  solid electrolyte with Cu  $K\alpha$  source.

### Electrochemical impedance spectroscopy (EIS) of $\text{Li}_{0.35}\text{La}_{0.55}\text{TiO}_3$

Gold 60 nm was deposited using RF sputtering on LLTO pellet (diameter  $\approx 10$  mm, height  $\approx 1$  mm) to construct Au|LLTO|Au symmetric cell. Figure S2 shows the EIS spectra obtained from the sample. The equivalent circuit shown in figure S2 (a) inset was used to model the spectra composed of bulk Li-ion conductivity, domain boundary Li-ion conductivity and Au Li-blocking electrode. The bulk conductivity determined from spectra was found to be 1.28 mS/cm

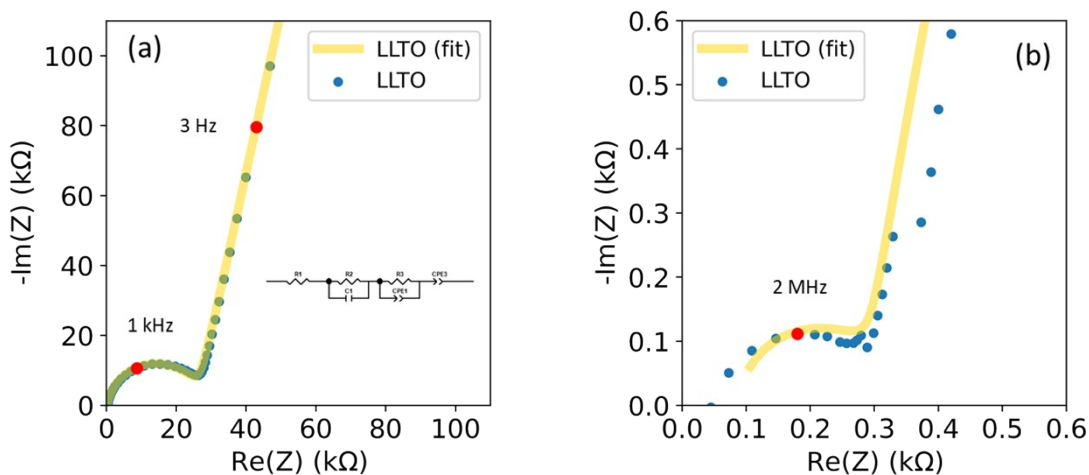

Figure S2: EIS spectra from Au|LLTO|Au symmetric cell. (a) full EIS spectra, (b) magnified EIS spectra in high frequency region. The inset in (a) shows the equivalent circuit used to model the spectra.

### Electrochemical impedance spectroscopy (EIS) of Au|LCO|LLTO|LCO|Au

Figure S4 (a-d) shows the magnified EIS spectra from Au|LCO|LLTO|LCO|Au symmetric cells for different thermally treated samples. Gold was deposited after the thermal treatment by RF sputtering.

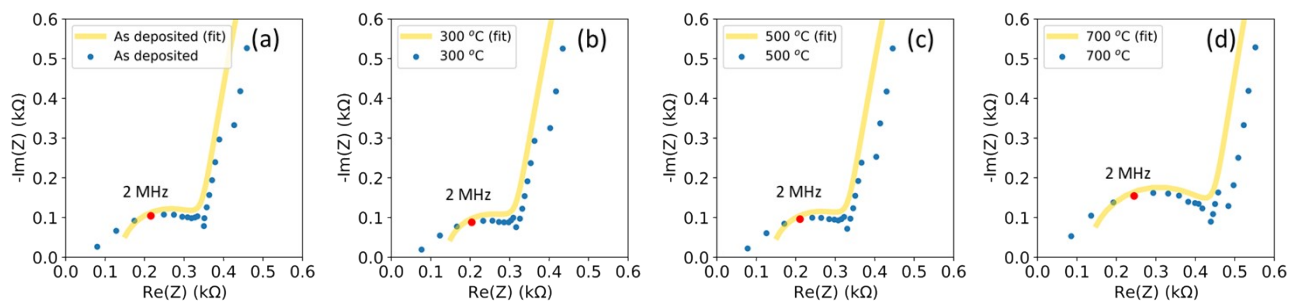

Figure S3: Magnified spectra in high-frequency range from the (e) as deposited sample and samples annealed at (f) 300 °C, (g) 500 °C and (h) 700 °C respectively.

## Hard X-ray photoelectron spectroscopy (HAXPES) sample configuration

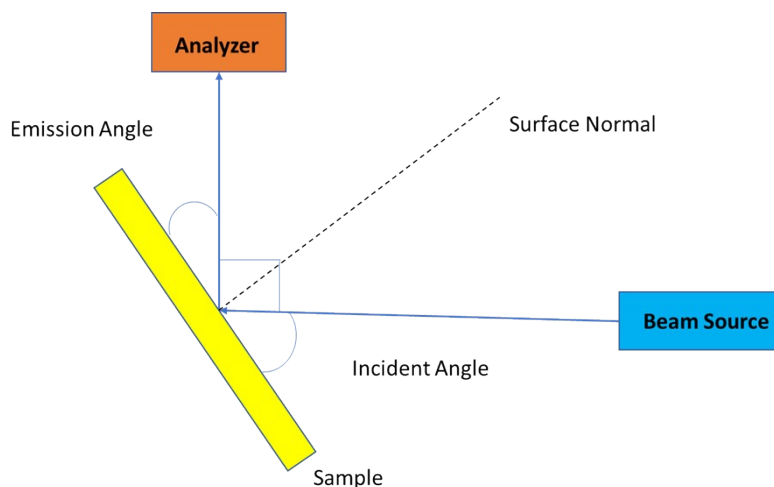

Figure S4: HAXPES experiment sample configuration

## C 1s spectra from X-ray photoelectron spectroscopy (XPS) depth profile

Figure S5 shows the C 1s spectra from XPS depth profile with soft X-ray (Al K $\alpha$ ) coupled with Ar-ion sputtering. The C 1s spectra were collected after every 3 minutes of sputtering time for samples undergone different annealing treatment. The spectra of C 1s are shown for those sputtering time that are near the interface of LCO|LLTO as discussed in Section 3 (III).

The C 1s signal remained very low for all LCO|LLTO samples irrespective of annealing condition. This observation rules out the formation of Li<sub>2</sub>CO<sub>3</sub> at the LCO|LLTO interface.

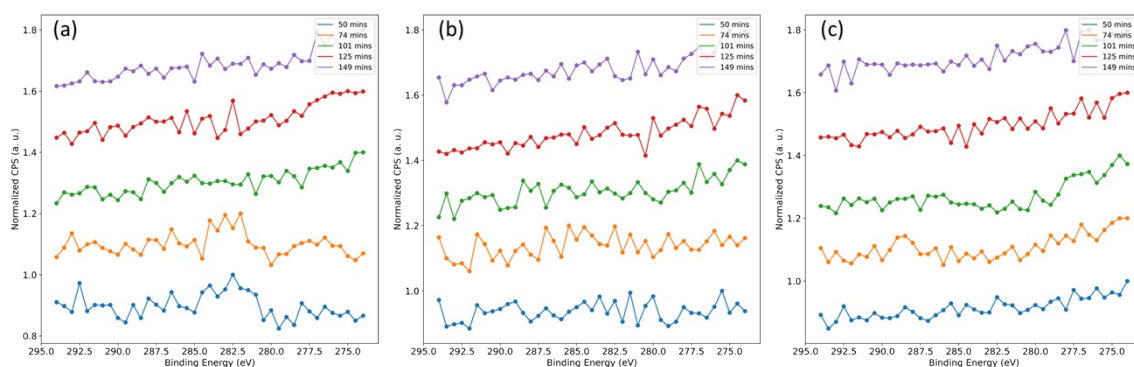

Figure S5: X-ray photoelectron spectroscopy (XPS) for C 1s for LCO|LLTO for (a) as deposited sample, (b) 500 °C annealed and (c) 700 °C annealed sample. The C 1s spectra are shown after selected Ar-ion sputtering time to decipher information near the LCO|LLTO.

## References

- 1 T. Polczyk, W. Zając, M. Ziábka and K. Świerczek, *J. Mater. Sci.*, 2021, **56**, 2435–2450.
- 2 J. Ibarra, A. Várez, C. León, J. Santamaría, L. M. Torres-Martínez and J. Sanz, *Solid State Ionics*, 2000, **134**, 219–228.
